# Supplementary material
Source: Research Square preprint supplement (doi:10.21203/rs.3.rs-9242207/v1)
Supplement: Supplementary file 1 [file 17a84e3cb100f8cd3a100b10.docx]

|  |  | **HRs (95%CIs)** | | |
| --- | --- | --- | --- | --- |
|  | **Cases** | **Smoking** | **Unhealthy sleep** | **Physical inactivity** |
| **Baseline→FNDP** | | | | |
| **Baseline→Dementia** | 3,893 | **1.19 (1.07,1.32)** | **1.18 (1.10,1.27)** | 1.01(0.94.1.08) |
| **Baseline→PD** | 1,743 | 1.02 (0.98,1.05) | 1.09 (0.98,1.23) | **1.17 (1.06.1.29)** |
| **Baseline→Anxiety** | 13,147 | 1.03 (0.97,1.09) | 0.97 (0.93,1.12) | 0.99 (0.96.1.03) |
| **Baseline→Depression** | 11,985 | 1.07 (1.00,1.14) | 0.99 (0.94,1.12) | 1.02 (0.98,1.06) |
| **Baseline→Sleep disorders** | 6.648 | **1.37 (1.27,1.47)** | **1.68 (1.60,1.77)** | **1.35 (1.28,1.41)** |
| **FNDP****→NMP** | | | | |
| **Dementia→NMP** | 791 | 0.98 (0.96,1.35) | 0.99 (0.81,1.35) | 1.22 (0.92,1.63) |
| **PD→NMP** | 518 | 0.97 (0.95, 1.45) | 1.13 (0.86.1.46) | 0.97 (0.89,1.24) |
| **Anxiety→NMP** | 3.069 | 1.12 (0.95,1.32) | 1.06 (0.95,1.19) | 1.04 (0.95,1.23) |
| **Depression→NMP** | 3,097 | 1.12 (0.96,1.32) | 1.00 (0.89,1.12) | 1.00 (0.91,1.11) |
| **Sleep disorders →NMP** | 796 | 0.97 (0.96,1.17) | 1.12 (0.93,1.35) | 0.98 (0.98,1.18) |
| **Baseline→Death** | 16,395 | **2.28 (2.20,2.37)** | **1.12 (1.08,1.16)** | **1.14 (1.10,1.17)** |
| **FNDP→Death** | | | | |
| **Dementia →Death** | 1,963 | **1.20 (1.03,1.39)** | 0.98 (0.90,1.08) | 1.02 (0.92,1.12) |
| **PD→Death** | 600 | **1.64 (1.13,2.38)** | 1.03 (0.81,1.31) | 1.14 (0.92,1.41) |
| **Anxiety→Death** | 906 | **2.17 (1.71,2.78)** | 1.13 (0.92,1.40) | 0.96 (0.89,1.16) |
| **Depression→Death** | 860 | **2.53 (1.98,3.23)** | 1.15 (0.92,1.44) | **1.35 (1.10,1.66)** |
| **Sleep disorders →Death** | 784 | **1.71 (1.41,2.08)** | 1.03 (0.89,1.20) | **1.20 (1.02,1.41)** |
| **NMP→Death** | 711 | 1.07 (0.83,1.39) | 1.05 (0.88.1.26) | 1.15 (0.98,1.35) |
