# Supplementary material
Source: Research Square preprint supplement (doi:10.21203/rs.3.rs-9242207/v1)
Supplement: Supplementary file 2 [file 4afb8541b29273b05e83b11d.docx]

|  | HRs (95%CIs) | | | | |
| --- | --- | --- | --- | --- | --- |
|  | Baseline → FNPD | FNPD → NPM | Baseline → Death | FNPD → Death | NPM → Death |
| **0** | Reference | Reference | Reference | Reference | Reference |
| **1** |  |  |  |  |  |
| Different interval |  |  |  |  |  |
| 0.5 days | 1.05 (1.02, 1.07) | 1.01 (0.87, 1.18) | 1.20 (1.17, 1.25) | 1.15 (1.07, 1.25) | 1.32 (1.11, 1.56) |
| 0.5 years | 1.05 (1.02, 1.07) | 1.00 (0.85, 1.17) | 1.22 (1.18, 1.26) | 1.16 (1.07, 1.25) | 1.30 (1.10, 1.54) |
| 1 year | 1.05 (1.02, 1.07) | 1.00 (0.87, 1.17) | 1.22 (1.17, 1.26) | 1.16 (1.07, 1.26) | 1.30 (1.09, 1.54) |
| 3 years | 1.05 (1.02, 1.07) | 1.00 (0.86, 1.17) | 1.22 (1.17, 1.26) | 1.16 (1.07, 1.26) | 1.30 (1.09, 1.54) |
| 5 years | 1.05 (1.02, 1.07) | 1.00 (0.86, 1.16) | 1.22 (1.18, 1.26) | 1.16 (1.07, 1.25) | 1.25 (1.05, 1.49) |
| Excluding participants who entered different states on the same date | 1.05 (1.02, 1.07) | 1.00 (0.93, 1.07) | 1.22 (1.18, 1.26) | 1.17 (1.07, 1.27) | 1.13 (0.93, 1.37) |
| Additional adjustment for total cholesterol, triglyceride, and C-reactive protein | 1.4 (1.01, 1.05) | 1.01 (0.87, 1.17) | 1.17 (1.15, 1.22) | 1.14 (1.06, 1.24) | 1.31 (1.10, 1.54) |
| Excluding events occurred in the first two-year of follow-up | 1.05 (1.02, 1.08) | 1.01 (0.88, 1.16) | 1.22 (1.18, 1.26) | 1.17 (1.07, 1.27) | 1.24 (1.03, 1.49) |
| **2** |  |  |  |  |  |
| Different interval |  |  |  |  |  |
| 0.5 days | 1.19 (1.15, 1.23) | 1.02 (1.00, 1.06) | 1.68 (1.61, 1.75) | 1.46 (1.32, 1.61) | 1.70 (1.38, 2.09) |
| 0.5 years | 1.19 (1.15, 1.23) | 1.02 (1.00, 1.06) | 1.70 (1.63, 1.77) | 1.46 (1.32, 1.61) | 1.67 (1.35, 2.06) |
| 1 year | 1.19 (1.15, 1.23) | 1.01 (0.98, 1.05) | 1.70 (1.62, 1.77) | 1.47 (1.33, 1.62) | 1.68 (1.36, 2.07) |
| 3 years | 1.19 (1.15, 1.23) | 1.01 (0.97, 1.05) | 1.70 (1.62, 1.77) | 1.48 (1.34, 1.63) | 1.64 (1.32, 2.02) |
| 5 years | 1.19 (1.15, 1.23) | 1.01 (0.98, 1.05) | 1.70 (1.63, 1.77) | 1.49 (1.35, 1.64) | 1.55 (1.25, 1.92) |
| Excluding participants who entered different states on the same date | 1.19 (1.16, 1.23) | 1.00 (0.96, 1.05) | 1.70 (1.62, 1.77) | 1.49 (1.34, 1.64) | 1.39 (1.08, 1.77) |
| Additional adjustment for total cholesterol, triglyceride, and C-reactive protein | 1.13 (1.10, 1.17) | 1.00 (0.98, 1.03) | 1.62 (1.54, 1.70) | 1.43 (1.30, 1.57) | 1.68 (1.35, 2.01) |
| Excluding events occurred in the first two-year of follow-up | 1.18 (1.14, 1.22) | 1.00 (0.96, 1.05) | 1.70 (1.63, 1.77) | 1.44 (1.30, 1.60) | 1.58 (1.28, 1.94) |
| **3** |  |  |  |  |  |
| Different interval |  |  |  |  |  |
| 0.5 days | 1.29 (1.19, 1.39) | 1.23 (1.14, 1.30) | 3.11 (2.86, 3.37) | 2.18 (1.79, 2.68) | 1.40 (0.94, 2.48) |
| 0.5 years | 1.29 (1.19, 1.39) | 1.22 (1.10, 1.27) | 3.17 (2.92, 3.44) | 2.21 (1.81, 2.71) | 1.39 (0.79, 2.46) |
| 1 year | 1.29 (1.19, 1.39) | 1.22 (1.10, 1.28) | 3.17 (2.92, 3.44) | 2.21 (1.81, 2.71) | 1.39 (0.78, 2.45) |
| 3 years | 1.29 (1.19, 1.39) | 1.21 (1.09, 1.28) | 3.17 (2.92, 3.44) | 2.22 (1.81, 2.72) | 1.37 (0.77, 2.41) |
| 5 years | 1.29 (1.19, 1.39) | 1.21 (1.10, 1.28) | 3.17 (2.92, 3.44) | 2.23 (1.82, 2.72) | 1.32 (0.75, 2.34) |
| Excluding participants who entered different states on the same date | 1.29 (1.19, 1.40) | 1.22 (1.08, 1.38) | 3.16 (2.92, 3.43) | 2.29 (1.87, 2.82) | 1.35 (0.78, 2.42) |
| Additional adjustment for total cholesterol, triglyceride, and C-reactive protein | 1.25 (1.12, 1.34) | 1.21 (1.11, 1.28) | 3.05 (2.79, 3.30) | 2.16 (1.76, 2.67) | 1.36 (0.91, 2.46) |
| Excluding events occurred in the first two-year of follow-up | 1.28 (1.19, 1.39) | 1.22 (1.08, 1.38) | 3.17 (2.92, 3.44) | 2.18 (1.82, 2.72) | 1.45 (0.75, 2.34) |
| **Per 1-cardiometabolic disease increase** |  |  |  |  |  |
| Different interval |  |  |  |  |  |
| 0.5 days | 1.08 (1.07, 1.10) | 1.04 (1.00, 1.16) | 1.34 (1.32, 1.37) | 1.23 (1.18, 1.28) | 1.26 (1.15, 1.39) |
| 0.5 years | 1.08 (1.07, 1.10) | 1.04 (1.01, 1.16) | 1.35 (1.33, 1.38) | 1.23 (1.18, 1.29) | 1.25 (1.14, 1.38) |
| 1 year | 1.08 (1.07, 1.10) | 1.04 (1.01, 1.15) | 1.35 (1.33, 1.38) | 1.23 (1.18, 1.29) | 1.25 (1.14, 1.38) |
| 3 years | 1.08 (1.07, 1.10) | 1.04 (1.01, 1.16) | 1.35 (1.33, 1.38) | 1.24 (1.19, 1.29) | 1.24 (1.13, 1.37) |
| 5 years | 1.09 (1.07, 1.10) | 1.03 (1.00, 1.13) | 1.35 (1.33, 1.38) | 1.24 (1.19, 1.30) | 1.21 (1.10, 1.34) |
| Excluding participants who entered different states on the same date | 1.09 (1.07, 1.10) | 1.02 (0.99, 1.06) | 1.35 (1.33, 1.38) | 1.25 (1.19, 1.30) | 1.13 (1.01, 1.26) |
| Additional adjustment for total cholesterol, triglyceride, and C-reactive protein | 1.06 (1.05, 1.09) | 1.03 (0.98, 1.15) | 1.32 (1.29, 1.35) | 1.23 (1.17, 1.28) | 1.24 (1.14, 1.36) |
| Excluding events occurred in the first two-year of follow-up | 1.08 (1.07, 1.10) | 1.03 (1.00, 1.14) | 1.35 (1.33, 1.38) | 1.22 (1.17, 1.28) | 1.21 (1.09, 1.35) |
