# Supplementary material
Source: Research Square preprint supplement (doi:10.21203/rs.3.rs-9242207/v1)
Supplement: Supplementary file 3 [file 509788d8470b13c6c3cbc74a.docx]

|  |  | **HRs (95%CIs)** | | | |  |
| --- | --- | --- | --- | --- | --- | --- |
|  | **Cases** | **0** | **1** | **2** | **3** | **Ordinal scale** |
| **Baseline→FNDP** | | | | |  |  |
| **Baseline →Dementia** | 3,893 | Reference | 1.03 (0.96,1.12) | **1.20 (1.09,1.33)** | **1.53 (1.22,1.93)** | **1.10 (1.05,1.15)** |
| **Baseline →PD** | 1.743 | Reference | 1.05 (0.94,1.18) | 1.13 (0.99,1.31) | **1.17 (1.06,1.35)** | 1.03 (0.97,1.11) |
| **Baseline→Anxiety** | 13.147 | Reference | 1.00 (0.96.1.04) | 0.98 (0.93.1.13) | 1.09 (0.98,1.26) | 1.01 (0.98,1.07) |
| **Baseline→Depression** | 11.985 | Reference | 1.00 (0.95.1.04) | 1.06 (1.00,1.13) | 1.13 (0.99.1.32) | 1.02 (0.99,1.04) |
| **Baseline→Sleep disorders** | 6,648 | Reference | **1.41 (1.33,1.50)** | **2.17 (2.03,2.33)** | **3.08(2.68.3.53)** | **1.47 (1.42,1.52)** |
| **FNDP****→NMP** | | | | |  |  |
| **Dementia→NMP** | 791 | Reference | 1.24 (0.90,1.72) | 0.97 (0.65,1.44) | 1.90 (0.87,4.15) | 1.05 (0.88,1.26) |
| **PD→NMP** | 518 | Reference | 1.02 (0.78,1.33) | 1.16 (0.82.1.65) | 0.97 (0.85.2.54) | 1.02 (0.88,1.20) |
| **Anxiety→NMP** | 3,069 | Reference | 1.02 (0.93,1.13) | 0.98 (0.90,1.20) | 1.11 (0.75,1.64) | 1.00 (0.93.1.07) |
| **Depression→NMP** | 3,097 | Reference | 1.01 (0.90,1.13) | 1.01 (0.88,1.18) | 1.27 (0.87,1.86) | 1.02 (0.96,1.09) |
| **Sleep disorders →NMP** | 796 | Reference | 1.27 (0.89,1.42) | 1.14 (0.87,1.48) | 0.97 (0.83,1.17) | 1.01 (0.91,1.14) |
| **Baseline→Death** | 16.395 | Reference | **1.18 (1.14,1.22)** | **1.65 (1.58,1.72)** | **3.03 (2.80,3.29)** | **1.33 (1.31,1.36)** |
| **FNDP→Death** | | | | | | |
| **Dementia →Death** | 1,963 | Reference | 1.05 (0.93,1.17) | 0.98 (0.85,1.12) | 1.18 (0.86.1.63) | 1.02 (0.97,1.14) |
| **PD→Death** | 600 | Reference | 0.98 (0.78,1.25) | **1.49 (1.11,2.00)** | 1.18 (0.52.2.68) | **1.16 (1.01,1.34)** |
| **Anxiety→Death** | 906 | Reference | 1.05 (0.84.1.32) | **1.53 (1.17,2.00)** | **1.88 (1.01.3.47)** | **1.23 (1.08,1.39)** |
| **Depression→Death** | 860 | Reference | **1.21 (0.94,1.55)** | **2.15 (1.63,2.83)** | **3.40 (1.95,5.94)** | **1.49 (1.31,1.69)** |
| **Sleep disorders →Death** | 784 | Reference | **1.26 (1.03,1.56)** | **1.38 (1.10.1.73)** | **1.85 (1.28,2.69)** | **1.19 (1.08,1.31)** |
| **NMP→Death** | 711 | Reference | 1.09 (0.91,1.32) | **1.36 (1.08,1.70)** | 1.06 (0.96,1.1.18) | 1.10 (0.99,1.22) |
