# Supplementary material
Source: Research Square preprint supplement (doi:10.21203/rs.3.rs-9242207/v1)
Supplement: Supplementary file 4 [file 80838d17efcc58222d2323ea.docx]

|  |  | **HRs (95%CIs)** | | |
| --- | --- | --- | --- | --- |
|  | **Cases** | **Smoking+**  **Unhealthy sleep** | **Smoking+Physical inactivity** | **Unhealthy sleep+Physical inactivity** |
| **Baseline→FNDP** | | | | |
| **Baseline →Dementia** | 3,893 | **1.39 (1.18.1.65)** | **1.22 (1.06,1.41)** | **1.17 (1.06,1.29)** |
| **Baseline →PD** | 1,743 | 1.03 (0.92,1.15) | 1.06 (0.97,1.21) | **1.17 (1.01,1.35)** |
| **Baseline→Anxiety** | 13,147 | 0.99 (0.90,1.10) | 1.00 (0.93,1.09) | 0.98 (0.94,1.03) |
| **Baseline→Depression** | 11,985 | 1.00 (0.90,1.12) | 1.06 (0.97,1.15) | 0.99 (0.94,1.05) |
| **Baseline→Sleep disorders** | 6.648 | **1.94 (1.75,2.15)** | **1.61 (1.47,1.77)** | **1.86 (1.75,1.97)** |
| **FNDP****→NMP** | | | | |
| **Dementia→NMP** | 791 | 0.99 (0.64,1.63) | 1.06 (0.59,1.90) | 1.08 (0.74.1.57) |
| **PD→NMP** | 518 | 0.95 (0.63,1.49) | 0.98 (0.63,1.44) | 1.04 (0.74,1.46) |
| **Anxiety→NMP** | 3,069 | 1.23 (0.94,1.61) | 1.01 (0.80,1.28) | 0.96 (0.82,1.12) |
| **Depression→NMP** | 3,097 | 1.19 (0.91,1.56) | 1.04 (0.84,1.30) | 1.03 (0.89,1.19) |
| **Sleep disorders →NMP** | 796 | 0.99 (0.72,1.21) | 0.97 (0.72,1.35) | 1.01 (0.82,1.26) |
| **Baseline→Death** | 16,395 | **2.31 (2.18,2.45)** | **2.34 (2.23,2.46)** | **1.26 (1.21,1.32)** |
| **FNDP→Death** |  |  |  |  |
| **Dementia →Death** | 1,963 | 1.26 (1.00.1.59) | 1.12 (0.92,1.37) | 0.98 (0.82,1.21) |
| **PD→Death** | 600 | 1.53 (0.95,2.67) | **1.66 (1.03,2.67)** | 1.20 (0.90,1.60) |
| **Anxiety→Death** | 906 | **2.25 (1.54.3.31)** | **1.91 (1.36,2.66)** | 1.09 (0.82,1.44) |
| **Depression→Death** | 860 | **2.30 (1.53,3.45)** | **2.79 (2.06,3.77)** | **1.53 (1.17,1.98)** |
| **Sleep disorders →Death** | 784 | **1.40 (1.06,1.86)** | **1.68 (1.33,2.13)** | 1.03 (0.86,1.24) |
| **NMP→Death** | 711 | 1.05 (0.82,1.24) | 1.04 (0.73,1.48) | 1.14 (0.91,1.41) |
