# Supplementary material
Source: Research Square preprint supplement (doi:10.21203/rs.3.rs-9242207/v1)
Supplement: Supplementary file 5 [file cdc52d12bac4f4ae9562facb.docx]

|  | Total | NPD free | FNPD survivor | NPM survivor | Death without NPD | Death with FNPD | Death with NPM |
| --- | --- | --- | --- | --- | --- | --- | --- |
| No. of participants, n | 317,163 | 282,153 | 25,533 | 4,941 | 16,395 | 3,613 | 924 |
| Age, years | 56.0(8.1) | 55.9(8.1) | 56.2(8.1) | 56.3(8.2) | 61.1(6.6) | 62.7(8.1) | 63.2(5.4) |
| Male | 153,974 (48.5) | 135,998 (48.2) | 12,699 (49.7) | 2,353 (47.6) | 10,480 (63.9) | 2,311 (63.9) | 613 (66.3) |
| Race, white | 287,989 (90.8) | 256,097  (90.7) | 23,199 (90.6) | 4,487  (90.8) | 15,137 (92.3) | 3,349 (92.6) | 856 (92.6) |
| TDI |  |  |  |  |  |  |  |
| 1 | 81,612  (25.7) | 73,057  (25.8) | 6,381 (24.9) | 1,201  (24.3) | 3,590  (21.8) | 763  (21.1) | 210 （22.7） |
| 2 | 80,266  (25.3) | 71,651  (25.3) | 6,292  (24.6) | 1,266  (25.6) | 3,806  (23.2) | 845  (23.3) | 212 （22.9） |
| 3 | 80,159  (25.2) | 71,338  (25.2) | 6,475  (25.3) | 1,203  (24.3) | 4,015  (24.4) | 910  (25.1) | 233（25.2） |
| 4 | 75,126  (23.6) | 66,107  (23.4) | 6,384  (25.0) | 1,271  (25.7) | 4,984  (30.3) | 1,095  (30.3) | 269 （29.1） |
| Household income |  |  |  |  |  |  |  |
| High | 85,482  (26.9) | 77,321 (27.4) | 6,487 (25.4) | 1,244 (25.1) | 2,279 (13.9) | 339  (9.3) | 91 (9.8) |
| Medium | 162,657 (51.2) | 144,886 (51.3) | 13,098 (51.3) | 2,516 (50.9) | 7,881 (48.0) | 1,706 (47.2) | 451 (48.8) |
| Low | 69,024  (21.7) | 59,946 (21.2) | 5,947 (23.2) | 1,181 (23.9) | 6,235 (38.0) | 1,568 (43.3) | 382 (41.3) |
| College or university degree | 112,249  (35.3) | 100,740 (35.7) | 8,762 (34.3) | 1,671 (33.8) | 4,270 (26.0) | 855 (23.6) | 221 (23.9) |
| Employment status (working) | 192,056 (60.5) | 172,848 (61.2) | 15,092 (59.1) | 2,887 (58.4) | 5,923 (36.2) | 970  (26.8) | 259 (28.0) |
| BMI, kg/m2 | 27.3(4.6) | 27.2(4.6) | 30.0(5.2) | 27.5(4.9) | 28.1(5.1) | 28.5(4.6) | 28.5(5.5) |
| Healthy drinking, yes (%) | 212,756 (67.0) | 188,907 (66.9) | 17,335 (67.8) | 3,362  (68.0) | 10,673  (65.0) | 2,504 (69.3) | 648 (70.1) |
| Healthy diet,yes (%) | 154,768  (48.7) | 137,653 (48.7) | 12,505 (48.9) | 2,420 (48.9) | 7,291 (44.4) | 1,730 (47.8) | 460 (49.7) |
| Hypertension, yes (%) | 87,576  (27.6) | 75,915  (26.9) | 7,935  (31.0) | 1,478  (29.9) | 7,332  (44.7) | 2,248  (49.5) | 467  (50.5) |
| Diabetes, yes (%) | 15,760  (4.9) | 13,234  (4.6) | 1,819  (5.9) | 267  (5.4) | 2,061  (12.5) | 547  (15.1) | 160  (17.3) |
| Prior stroke,yes (%) | 90,022  (28.3) | 77,968  (27.6) | 8,182  (32.0) | 1,522  (30.8) | 7,645  (46.6) | 1,859  (51.4) | 491  (53.1) |
