# Supplementary material
Source: Research Square preprint supplement (doi:10.21203/rs.3.rs-9242207/v1)
Supplement: Supplementary file 6 [file eadedfc857ef59c37cafb430.docx]

|  | **First neuropsychiatric**  **disease** | |  | **Neuropsychiatric multimorbidity** | |  | **Death** | |
| --- | --- | --- | --- | --- | --- | --- | --- | --- |
|  | **Cases** | **HRs (95% CIs)** |  | **Cases** | **HRs (95% CIs)** |  | **Cases** | **HRs (95% CIs)** |
| **Smoking status** |  |  |  |  |  |  |  |  |
| Never smoking | 31,151 | Reference |  | 5,231 | Reference |  | 16,921 | Reference |
| previous or current smoking | 3,859 | 1.10 (1.06, 1.13) |  | 634 | 1.07 (0.98, 1.16) |  | 4,011 | 2.29 (2.21, 2.38) |
| **Healthy sleep** |  |  |  |  |  |  |  |  |
| Yes | 25,135 | Reference |  | 4,222 | Reference |  | 14,819 | Reference |
| No | 9,875 | 1.12 (1.09, 1.15) |  | 1,643 | 1.11 (1.05, 1.18) |  | 6,113 | 1.15 (1.12, 1.19) |
| **Physical activity** |  |  |  |  |  |  |  |  |
| Yes | 18,411 | Reference |  | 3,134 | Reference |  | 10,582 | Reference |
| No | 16,599 | 1.05 (1.03, 1.07) |  | 2,731 | 1.03 (0.97, 1.08) |  | 10,350 | 1.17 (1.14, 1.21) |
| **Number of unhealthy lifestyle factors** |  |  |  |  |  |  |  |  |
| 0 | 12,241 | Reference |  | 2,097 | Reference |  | 6,451 | Reference |
| 1 | 15,921 | 1.05 (1.02, 1.07) |  | 2,649 | 1.03 (0.97, 1.09) |  | 9,293 | 1.22 (1.18, 1.26) |
| 2 | 6,132 | 1.19 (1.15, 1.22) |  | 998 | 1.14 (1.05, 1.23) |  | 4,383 | 1.72 (1.66, 1.79) |
| 3 | 716 | 1.29 (1.19, 1.39) |  | 121 | 1.27 (1.06, 1.53) |  | 805 | 3.15 (2.93, 3.40) |
| **Per 1-unhealthy lifestyle factors** |  | 1.08 (1.07 ,1.10) |  |  | 1.06 (1.03, 1.10) |  |  | 1.36 (1.33, 1.38) |
| **Smoking + Unhealthy sleep** |  |  |  |  |  |  |  |  |
| No | 33,668 | Reference |  | 5,640 | Reference |  | 19,531 | Reference |
| Yes | 1,342 | 1.21 (1.14, 1.27) |  | 225 | 1.20 (1.05, 1.38) |  | 1,401 | 2.41 (2.28, 2.55) |
| **Smoking + Physical inactivity** |  |  |  |  |  |  |  |  |
| No | 33,001 | Reference |  | 5,537 | Reference |  | 18,773 | Reference |
| Yes | 2,009 | 1.14 (1.09, 1.20) |  | 328 | 1.11 (0.99, 1.24) |  | 2,159 | 2.34 (2.23, 2.45) |
| **Unhealthy sleep + Physical inactivity** |  |  |  |  |  |  |  |  |
| No | 30,081 | Reference |  | 5,057 | Reference |  | 17,694 | Reference |
| Yes | 9,929 | 1.15 (1.11, 1.18) |  | 808 | 1.13 (1.05, 1.22) |  | 3,238 | 1.26 (1.21, 1.31) |
