# Supplementary material
Source: Research Square preprint supplement (doi:10.21203/rs.3.rs-9242207/v1)
Supplement: Supplementary file 7 [file f138ceb2a5ba82d9a8438610.docx]

|  | HRs (95%CIs) | | | | |
| --- | --- | --- | --- | --- | --- |
|  | Baseline → FNPD | FNPD → NPM | Baseline → Death | FNPD → Death | NPM → Death |
| **Smoking** |  |  |  |  |  |
| Different interval |  |  |  |  |  |
| 0.5 days | 1.10 (1.06, 1.14) | 1.01 (0.98, 1.04) | 2,32 (2,23, 2.41) | 1.76 (1.60, 1.94) | 1.57 (1.25, 1.96) |
| 0.5 years | 1.10 (1.06, 1.14) | 1.02 (0.99, 1.06) | 2.34 (2.25, 2.43) | 1.76 (1.60, 1.93) | 1.58 (1.26, 1.96) |
| 1 year | 1.10 (1.06, 1.14) | 1.02 (0.99, 1.06) | 2.34 (2.25, 2.43) | 1.76 (1.60, 1.94) | 1.58 (1.27, 1.98) |
| 3 years | 1.10 (1.06, 1.14) | 1.01 (0.97, 1.06) | 2.34 (2.25, 2.43) | 1.77 (1.61, 1.95) | 1.55 (1.23, 1.95) |
| 5 years | 1.10 (1.06, 1.14) | 1.01 (0.98, 1.04) | 2.34 (2.25, 2.44) | 1.77 (1.61, 1.95) | 1.53 (1.21, 1.93) |
| Excluding participants who entered different states on the same date | 1.10 (1.07, 1.14) | 1.00 (0.90, 1.11) | 2.34 (2.25, 2.44) | 1.81 (1.64, 2.00) | 1.42 (1.08, 1.87) |
| Additional adjustment for total cholesterol, triglyceride and C-reactive protein | 1.09 (1.05, 1.12) | 1.00 (0.97, 1.03) | 2,31 (2,22, 2.39) | 1.76 (1.60, 1.95) | 1.56 (1.24, 1.96) |
| Excluding events occurred in the first two-year of follow-up | 1.10 (1.06, 1.14) | 0.99 (0.96, 1.05) | 2.34 (2.25, 2.43) | 1.77 (1.60, 1.97) | 1.33 (1.02, 1.73) |
| **Unhealthy sleep** |  |  |  |  |  |
| Different interval |  |  |  |  |  |
| 0.5 days | 1.12 (1.09, 1.15) | 1.02 (0.99, 1.04) | 1.13 (1.09, 1.17) | 1.07 (1.00, 1.16) | 1.11 (0.95, 1.30) |
| 0.5 years | 1.12 (1.09, 1.15) | 1.02 (0.99, 1.03) | 1.13 (1.09, 1.16) | 1.08 (1.00, 1.16) | 1.09 (0.93, 1.28) |
| 1 year | 1.12 (1.09, 1.15) | 1.02 (0.97, 1.07) | 1.13 (1.09, 1.16) | 1.08 (1.00, 1.16) | 1.10 (0.94, 1.30) |
| 3 years | 1.12 (1.09, 1.15) | 1.03 (0.98, 1.08) | 1.13 (1.09, 1.16) | 1.08 (1.00, 1.17) | 1.10 (0.94, 1.30) |
| 5 years | 1.12 (1.09, 1.15) | 1.02 (0.98, 1.08) | 1.12 (1.09, 1.16) | 1.09 (1.01, 1.18) | 1.08 (0.92, 1.27) |
| Excluding participants who entered different states on the same date | 1.12 (1.10, 1.15) | 1.01 (0.94, 1.09) | 1.12 (1.09, 1.16) | 1.08 (1.00, 1.17) | 0.99 (0.82, 1.19) |
| Additional adjustment for total cholesterol, triglyceride and C-reactive protein | 1.11 (1.08, 1.13) | 1.02 (0.99, 1.03) | 1.12 (1.07, 1.15) | 1.06 (1.00, 1.14) | 1.10 (0.94, 1.30) |
| Excluding events occurred in the first two-year of follow-up | 1.12 (1.09, 1.14) | 1.01 (0.96, 1.06) | 1.13 (1.09, 1.16) | 1.06 (0.98, 1.15) | 1.15 (0.97, 1.37) |
| **Irregular physical activity** |  |  |  |  |  |
| Different interval |  |  |  |  |  |
| 0.5 days | 1.05 (1.03, 1.08) | 1.03 (0.98, 1.08) | 1.16 (1.13, 1.20) | 1.17 (1.09, 1.25) | 1.30 (1.12, 1.50) |
| 0.5 years | 1.05 (1.03, 1.07) | 1.03 (0.97, 1.09) | 1.17 (1.14, 1.21) | 1.17 (1.09, 1.25) | 1.29 (1.11, 1.49) |
| 1 year | 1.05 (1.03, 1.07) | 1.03 (0.97, 1.09) | 1.17 (1.14, 1.21) | 1.17 (1.09, 1.25) | 1.27 (1.10, 1.47) |
| 3 years | 1.05 (1.03, 1.07) | 1.03 (0.96, 1.09) | 1.17 (1.14, 1.21) | 1.17 (1.09, 1.25) | 1.25 (1.08, 1.46) |
| 5 years | 1.05 (1.03, 1.08) | 1.03 (0.97, 1.08) | 1.17 (1.14, 1.21) | 1.17 (1.09, 1.25) | 1.22 (1.05, 1.42) |
| Excluding participants who entered different states on the same date | 1.05 (1.03, 1.07) | 1.01 (0.98, 1.05) | 1.17 (1.13, 1.21) | 1.18 (1.10, 1.26) | 1.16 (0.98, 1.38) |
| Additional adjustment for total cholesterol, triglyceride and C-reactive protein | 1.04 (1.02, 1.06) | 1.02 (0.97, 1.07) | 1.14 (1.11, 1.18) | 1.17 (1.08, 1.25) | 1.30 (1.12, 1.49) |
| Excluding events occurred in the first two-year of follow-up | 1.05 (1.02, 1.07) | 1.01 (0.98, 1.04) | 1.17 (1.14, 1.21) | 1.17 (1.08, 1.25) | 1.22 (1.03, 1.43) |
